# Supplementary material for: Distinguishing between yield advances and yield plateaus in historical crop production trends
Source: PubMed Central journal article supplement (PMC3905725; doi:10.1038/ncomms3918), 2013-12-17
Supplement: ncomms3918-s1.pdf [file ncomms3918-s1.pdf]

## Supplementary information

**Supplementary Table S1 Change in total harvested area of staple crops and selected grain crops by continent and sub-regions as defined by the Food and Agriculture Organization.**

|                               | Staple crops * | Rice (R)    | Wheat (W)   | Maize (M)    | Soybean (S)  | Total<br>R+W+M+S          |
|-------------------------------|----------------|-------------|-------------|--------------|--------------|---------------------------|
| World                         | +84.6 (+8%)    | +14.9 (+7%) | +8.1 (+5%)  | +26.2 (+17%) | +21.5 (+25%) | +70.7 (+12%)              |
| Africa †                      | +16.9 (+10%)   | +2.9 (+37%) | +0.4 (+5%)  | +6.4 (+24%)  | +0.3 (+26%)  | +10.0 (+22%)              |
| East                          | +11.0 (+25%)   | +1.4 (+63%) | +0.7 (+47%) | +2.8 (+24%)  | +0.1 (+24%)  | +4.9 (+31%)               |
| Middle                        | +4.2 (+29%)    | +0.1 (+25%) | nil         | +1.4 (+46%)  | nil          | +1.5 (+42%)               |
| North                         | -5.3 (-19%)    | -0.1 (-18%) | -4.4 (-22%) | nil          | nil          | -0.1 (-1%)                |
| South                         | -1.2 (-17%)    | nil         | -0.3 (-32%) | -1.0 (-26%)  | +0.3 (+225%) | -1.0 (-21%)               |
| West                          | +8.2 (+11%)    | +1.6 (+34%) | nil         | +3.2 (+47%)  | -0.1 (-13%)  | +4.7 (+39%)               |
| America ‡                     | +22.4 (+10%)   | nil         | -3.4 (-9%)  | +7.1 (+13%)  | +16.8 (+27%) | +20.5 (+12%) <sup>c</sup> |
| North                         | +1.6 (+1%)     | nil         | -2.2 (-7%)  | +5.0 (+17%)  | +1.5 (+5%)   | +4.4 (+5%)                |
| Central and<br>Caribbean      | -0.8 (-4%)     | nil         | +0.1 (+8%)  | -0.2 (-2%)   | +0.1 (+114%) | nil                       |
| South (total)                 | +21.5 (+25%)   | nil         | -1.2 (-13%) | +2.3 (+13%)  | +15.1 (+48%) | +16.2 (+25%)              |
| Tropical and<br>subtropical § | +13.5 (+22%)   | -0.1 (-3%)  | +0.1 (+4%)  | +1.3 (+8%)   | +7.8 (+40%)  | +9.0 (+21%)               |
| Temperate ¶                   | +8.0 (+31%)    | +0.1 (+40%) | -1.4 (-21%) | +1.0 (+40%)  | +7.3 (+61%)  | +7.1 (+33%)               |
| Asia †                        | +41.9 (+9%)    | +11.8 (+9%) | +6.1 (+6%)  | +11.6 (+27%) | +2.7 (+16%)  | +32.2 (+11%)              |
| Central                       | +2.4 (+12%)    | nil         | +2.0 (+14%) | nil          | nil          | +1.9 (+13%)               |
| East ‡                        | +7.8 (+6%)     | +2.3 (+8%)  | +1.4 (+6%)  | +8.7 (+35%)  | -1.0 (-10%)  | +11.4 (+13%) <sup>c</sup> |
| South                         | +19.3 (+9%)    | +2.9 (+5%)  | +4.7 (+11%) | +1.3 (+14%)  | +3.5 (+54%)  | +12.3 (+11%)              |
| Southeast                     | +15.5 (+19%)   | +6.6 (+15%) | nil         | +1.6 (+20%)  | +0.2 (+16%)  | +8.4 (+16%)               |
| West                          | -3.1 (-11%)    | nil         | -1.9 (-13%) | nil          | Nil          | -1.9 (-12%)               |
| Europe                        | +1.9 (+1%)     | +0.2 (+27%) | +3.5 (+7%)  | +1.2 (+8%)   | +1.8 (+160%) | +6.6 (+9%)                |
| East ‡                        | +4.4 (+4%)     | +0.1 (+58%) | +3.4 (+10%) | +1.8 (+23%)  | +1.7 (+249%) | +7.0 (+16%)               |
| North                         | +0.1 (+1%)     | nil         | +0.6 (+17%) | nil          | Nil          | +0.6 (+17%)               |
| South                         | -3.1 (-12%)    | +0.1 (+14%) | -1.7 (-24%) | -0.5 (-13%)  | +0.1 (+24%)  | -2.0 (-18%)               |
| West                          | +0.5 (+2%)     | nil         | +1.2 (+13%) | -0.2 (-7%)   | Nil          | +1.0 (+9%)                |
| Oceania                       | +1.4 (+6%)     | -0.1 (-49%) | +1.4 (+12%) | nil          | Nil          | +1.3 (+11%)               |

Note that absolute change (in Mha) was calculated as the difference between the 2-y crop harvested area averages calculated for the 2010-2011 and 2002-2003 intervals. Percentage change is shown in parenthesis. \* Includes all cereal, oil, sugar, pulses, fiber, tuber, and root crops. † Remaining increase in total crop land area in Africa and Asia, not explained by R+W+M+S, is mostly accounted by groundnuts (+1.7 Mha), dry beans (+1.3 Mha), cassava (+1.2 Mha), and cowpea (+1.0 Mha) in Africa and oil palm (+4.0 Mha), seed cotton (+3.8 Mha), and chickpea (+2.3 Mha) in Asia. ‡ Greater increase of R+W+M+S cropland area than in total cropland area in America, East Asia, and East Europe is explained by expansion of R+W+M+S at expense of harvested area of sorghum (-1.3 Mha), cotton (-0.8 Mha), and barley (-0.8 Mha) in USA, sweet potatoes (-1.7 Mha), dry beans (-0.4 Mha), and groundnuts (-0.4 Mha) in East Asia, and barley (-3.7 Mha), rye (-2.6 Mha), and potatoes (-1.8 Mha) in East Europe, respectively. § Brazil, Colombia, Peru, Guyana, Suriname, French Guiana, Ecuador, Venezuela, Bolivia, and Paraguay. ¶ Argentina, Uruguay, and Chile.

**Supplementary Table S2 Examples of compound annual rates of yield increase used in previous studies that evaluated scenarios of future food production security.**

| Reference | Country              | Crop species | Water regime     | Reported projected annual yield gain rate (% per year)* | Projected time interval |
|-----------|----------------------|--------------|------------------|---------------------------------------------------------|-------------------------|
| (12)      | South Asia           | Rice         | Total †          | 2.3                                                     | 1995-2020               |
|           |                      | Wheat/Maize  |                  | 1.9                                                     |                         |
| (13)      | United States        | Cereals      | Total †          | 1.0                                                     | 1993-2020               |
|           | Western Europe       |              |                  | 0.4                                                     |                         |
|           | Japan                |              |                  | -0.03                                                   |                         |
|           | Australia            |              |                  | 1.8                                                     |                         |
|           | Latin America        |              |                  | 1.4                                                     |                         |
|           | Central-west Africa  |              |                  | 1.8                                                     |                         |
|           | Eastern Africa       |              |                  | 1.8                                                     |                         |
|           | Sub-Saharan Africa   |              |                  | 1.7                                                     |                         |
|           | India                |              |                  | 1.4                                                     |                         |
|           | Bangladesh           |              |                  | 1.4                                                     |                         |
|           | Indonesia            |              |                  | 1.0                                                     |                         |
|           | Thailand             |              |                  | 1.0                                                     |                         |
|           | Philippines          |              |                  | 1.0                                                     |                         |
|           | Vietnam              |              |                  | 1.4                                                     |                         |
|           | China                |              |                  | 1.0                                                     |                         |
| (14)      | California           | Rice         | Rainfed          | 0.8                                                     | 2010-2050               |
|           |                      |              | Irrigated        | 1.4                                                     |                         |
|           | Developed countries  | Rice         | Rainfed          | 0.7                                                     |                         |
|           |                      |              | Irrigated        | 0.8                                                     |                         |
|           |                      | Wheat        | Rainfed          | 1.1                                                     |                         |
|           |                      |              | Irrigated        | 1.4                                                     |                         |
|           |                      | Maize        | Rainfed          | 0.7 (2.0) ‡                                             |                         |
|           |                      |              | Irrigated        | 0.4 (2.0) ‡                                             |                         |
|           | Low-income countries | Rice         | Rainfed          | 0.6                                                     |                         |
|           |                      |              | Irrigated        | 0.6                                                     |                         |
|           |                      | Wheat        | Rainfed          | 1.9                                                     |                         |
|           |                      |              | Irrigated        | 1.5                                                     |                         |
|           |                      | Maize        | Rainfed          | 1.0                                                     |                         |
|           |                      |              | Irrigated        | 0.4                                                     |                         |
|           | Mid-income countries | Rice         | Rainfed          | 0.8                                                     |                         |
|           |                      |              | Irrigated        | 0.6                                                     |                         |
|           |                      | Wheat        | Rainfed          | 1.3 (2.0) ‡                                             |                         |
|           |                      |              | Irrigated        | 0.7 (2.0) ‡                                             |                         |
| Maize     |                      | Rainfed      | 1.0 (2.0) ‡      |                                                         |                         |
|           |                      | Irrigated    | 0.9 (2.0) ‡      |                                                         |                         |
| (15)      | United States        | Rice         | Total †          | 2.1                                                     | 1995-2020               |
|           |                      | Wheat        |                  | 1.8                                                     |                         |
|           |                      | Maize        |                  | 2.9                                                     |                         |
| (16)      | United States        | Maize        | Total †          | 2.9                                                     | 2001-2030               |
| (17)      | United States        | Maize        | Total †          | 3.6                                                     | 2010-2030               |
| (18)      | United States        | Maize        | Current cropland | 2.8                                                     | 2001-2015               |

\* Compound growth rates calculated from values for the begin- and end-point of the projected time interval. † Not disaggregated by rainfed and irrigated regimes. ‡ Reported yield gain rate (% per year) under a scenario of higher investment on agriculture R&D is shown in parenthesis.

**Supplementary Table S3 Countries and regions selected for analysis of yield trends for the three major cereal crops from 1965 to 2010.**

| Rice (669 million Mg)                           | Wheat (647 million Mg) | Maize (798 million Mg) |
|-------------------------------------------------|------------------------|------------------------|
| Bangladesh (7%)                                 | Argentina (2%)         | Africa:                |
| China (29%)                                     | Australia (3%)         | east (2%)              |
| India (21%)                                     | Canada (4%)            | central (<1%)          |
| Indonesia (9%)                                  | China (17%)            | west (2%)              |
| Japan (2%)                                      | Denmark (1%)           | Argentina (2%)         |
| Korea, Rep. of (2%)                             | France (6%)            | Brazil (7%)            |
| Philippines (2%)                                | Germany (4%)           | China (20%)            |
| Thailand (5%)                                   | India (12%)            | France (2%)            |
| United States:                                  | The Netherlands (<1%)  | India (2%)             |
| California, (<1%)                               | United Kingdom (2%)    | Italy (1%)             |
| south-central (1%)                              | US Great Plains:       | US Corn Belt:          |
| Vietnam (6%)                                    | south (1%)             | east, rainfed (24%)    |
|                                                 | central (2%)           | west, irrigated (5%)   |
|                                                 | north (2%)             | west, rainfed (4%)     |
| Cumulative portion of annual global production: |                        |                        |
| Rice = 84%                                      | Wheat = 56%            | Maize = 71%            |

Note that average (2006-2010) world total production and percentage accounted by each country are shown in parenthesis for each crop. USA. South-central: Missouri, Mississippi, Arkansas, Louisiana, and Texas; US Great Plains: Oklahoma and Texas (south), Nebraska and Kansas (central); South Dakota and North Dakota (north); US Corn Belt: Iowa, Illinois, Minnesota, Indiana, Ohio, and Missouri (east); Nebraska, Kansas, South Dakota, North Dakota, Wyoming, Colorado, Texas, and Oklahoma (west). East Africa: Burundi, Djibouti, Eritrea, Ethiopia, Kenya, Madagascar, Malawi, Mozambique, Rwanda, Somalia, Uganda, Tanzania, Zambia, and Zimbabwe; Central Africa: Angola, Cameroon, Central Africa, Chad, Congo, Democratic Congo, Equatorial Guinea, Sao Tome and Principe, and Gabon; West Africa: Benin, Burkina Faso, Cape Verde, Cote d'Ivoire, Gambia, Ghana, Guinea, Guinea Bissau, Liberia, Mali, Mauritania, Niger, Nigeria, Senegal, Sierra Leone, and Togo.

**Supplementary Table S4 Selected statistical models for each crop-region case and associated goodness of fit and coefficients.**

| Country/region   | Model | $r^2$ (r.m.s.e.) * | Estimated model parameters † |                                  |                                  |                |                                       |
|------------------|-------|--------------------|------------------------------|----------------------------------|----------------------------------|----------------|---------------------------------------|
|                  |       |                    | a (kg ha <sup>-1</sup> )     | b (kg ha <sup>-1</sup> per year) | c (kg ha <sup>-1</sup> per year) | x <sub>0</sub> | y <sub>0</sub> (kg ha <sup>-1</sup> ) |
| <i>Rice</i>      |       |                    |                              |                                  |                                  |                |                                       |
| Bangladesh       | PW+   | 0.98 (120)         | -55,143                      | 28.9                             | 88.7                             | 1988           |                                       |
| China            | LUP   | 0.97 (216)         | -221,441                     | 114.1                            |                                  | 1997           | 6,394                                 |
| India            | L     | 0.95 (142)         | -87,503                      | 45.2                             |                                  |                |                                       |
| Indonesia        | PW-   | 0.98 (130)         | -214,770                     | 110.2                            | 31.1                             | 1987           |                                       |
| Japan            | L     | 0.61 (294)         | -47,214                      | 26.8                             |                                  |                |                                       |
|                  | LUP   | 0.63 (290)         | -61,543                      | 34.1                             |                                  | 1997           | 6,466                                 |
| Korea, Rep. of   | LUP   | 0.81 (412)         | -409,101                     | 210.0                            |                                  | 1978           | 6,363                                 |
| Philippines      | L     | 0.95 (167)         | -106,355                     | 54.8                             |                                  |                |                                       |
| Thailand         | PW+   | 0.95 (89)          | -18,213                      | 10.2                             | 45.2                             | 1988           |                                       |
| United States:   |       |                    |                              |                                  |                                  |                |                                       |
| California       | LUP   | 0.87 (490)         | -262,791                     | 136.4                            |                                  | 1992           | 8,822                                 |
| south-central    | LLP   | 0.93 (266)         |                              | 95.8                             |                                  | 1980           | 4,787                                 |
| Vietnam          | LLP   | 0.99 (134)         |                              | 106.0                            |                                  | 1979           | 2,013                                 |
| <i>Wheat</i>     |       |                    |                              |                                  |                                  |                |                                       |
| Argentina        | L     | 0.80 (232)         | -66,766                      | 34.6                             |                                  |                |                                       |
|                  | EXP   | 0.80 (234)         | 1,277                        | 0.018                            |                                  |                |                                       |
| Australia        | L     | 0.23 (336)         | -24,754                      | 13.2                             |                                  |                |                                       |
|                  | EXP   | 0.22 (333)         | 1,202                        | 0.009                            |                                  |                |                                       |
| Canada           | LLP   | 0.63 (248)         | 1,734                        | 30.7                             |                                  | 1980           |                                       |
| China            | L     | 0.97 (198)         | -173,723                     | 88.8                             |                                  |                |                                       |
| Denmark          | LUP   | 0.84 (477)         | -198,477                     | 103.1                            |                                  | 1995           | 7,208                                 |
| France           | LUP   | 0.93 (387)         | -242,219                     | 124.9                            |                                  | 1996           | 7,081                                 |
| Germany          | LUP   | 0.94 (365)         | -229,670                     | 118.6                            |                                  | 2000           | 7,494                                 |
| India            | LUP   | 0.98 (94)          | -103,404                     | 53.1                             |                                  | 2000           | 2,727                                 |
| The Netherlands  | LUP   | 0.90 (503)         | -302,080                     | 155.8                            |                                  | 1993           | 8,445                                 |
| United Kingdom   | LUP   | 0.91 (451)         | -265,606                     | 137.0                            |                                  | 1996           | 7,805                                 |
| US Great Plains: |       |                    |                              |                                  |                                  |                |                                       |
| south            | LUP   | 0.30 (280)         | -66,136                      | 34.4                             |                                  | 1983           | 2,005                                 |
| central          | L     | 0.37 (346)         | -35,417                      | 19.0                             |                                  |                |                                       |
|                  | EXP   | 0.36 (349)         | 1,948                        | 0.008                            |                                  |                |                                       |
| north            | LLP   | 0.50 (312)         |                              | 27.9                             |                                  | 1980           | 1,705                                 |
|                  | EXP   | 0.48 (314)         | 1,546                        | 0.011                            |                                  |                |                                       |
| <i>Maize</i>     |       |                    |                              |                                  |                                  |                |                                       |
| Africa:          |       |                    |                              |                                  |                                  |                |                                       |
| east             | LUP   | 0.49 (128)         | -37,230                      | 19.5                             |                                  | 1984           | 1,390                                 |
| central          | LLP   | 0.73 (56)          |                              | 13.0                             |                                  | 1989           | 761                                   |
| west             | LLP   | 0.91 (96)          |                              | 28.4                             |                                  | 1979           | 855                                   |
| Argentina        | PW+   | 0.91 (512)         | -134,778                     | 69.6                             | 175.8                            | 1989           |                                       |
|                  | EXP   | 0.90 (526)         | 1,901                        | 0.030                            |                                  |                |                                       |
| Brazil           | PW+   | 0.96 (183)         | -52,845                      | 27.5                             | 104.9                            | 1990           |                                       |
| China            | PW-   | 0.97 (211)         | -225,006                     | 115.2                            | 41.5                             | 1993           |                                       |
| France           | LUP   | 0.91 (536)         | -266,056                     | 137.3                            |                                  | 2003           | 8,901                                 |
| India            | LLP   | 0.90 (134)         |                              | 35.5                             |                                  | 1978           | 1,045                                 |
| Italy            | LUP   | 0.96 (380)         | -328,265                     | 169.0                            |                                  | 1997           | 9,347                                 |
| US Corn Belt:    |       |                    |                              |                                  |                                  |                |                                       |
| east, rainfed    | L     | 0.82 (774)         | -227,037                     | 118.0                            |                                  |                |                                       |
|                  | EXP   | 0.83 (757)         | 5,213                        | 0.016                            |                                  |                |                                       |
| west, irrigated  | L     | 0.93 (491)         | -246,713                     | 128.6                            |                                  |                |                                       |
|                  | EXP   | 0.93 (490)         | 6,280                        | 0.015                            |                                  |                |                                       |
| west, rainfed    | L     | 0.64 (879)         | -161,676                     | 83.9                             |                                  |                |                                       |
|                  | EXP   | 0.65 (867)         | 3,359                        | 0.017                            |                                  |                |                                       |

L: linear; QP: quadratic plateau; PW: piecewise with (+) increasing or (-) decreasing rate after breakpoint year; LUP/LLP: linear with upper/lower plateau; EXP: compound exponential. Forty-six years of yield data were used in the regression analyses (1965-2010) except for USA ( $n = 47$ , 1965-2011).

\* Coefficient of determination ( $r^2$ ) and root mean square error (r.m.s.e., in kg ha<sup>-1</sup>).

† Estimated model parameters were all significant (Student's  $t$ -test;  $P < 0.01$ ). See model equations in the Methods section.

**Supplementary Table S5 Linear rates of increase in yield. Rates of increase in yield are relative to the trend-line yield in 1970, 1990, and 2010.**

| Country/region        | Trend-line yields<br>(kg ha <sup>-1</sup> ) <sup>*</sup> |       |        | Absolute (kg ha <sup>-1</sup> per year) and relative<br>rate of gain (% per year, in parenthesis) <sup>†</sup> |           |           | Compound rate<br>(% per year) <sup>‡</sup> |
|-----------------------|----------------------------------------------------------|-------|--------|----------------------------------------------------------------------------------------------------------------|-----------|-----------|--------------------------------------------|
|                       | 1970                                                     | 1990  | 2010   | 1970                                                                                                           | 1990      | 2010      |                                            |
| <i>Rice</i>           |                                                          |       |        |                                                                                                                |           |           |                                            |
| Bangladesh (PW+)      | 1,790                                                    | 2,488 | 4,262  | 29 (1.6)                                                                                                       | 89 (3.6)  | 89 (2.1)  | 2.5                                        |
| China (LUP)           | 3,336                                                    | 5,618 | 6,394  | 114 (3.4)                                                                                                      | 114 (2.0) | 0 (0)     | 1.7                                        |
| India (L)             | 1,541                                                    | 2,445 | 3,349  | 45 (2.9)                                                                                                       | 45 (1.8)  | 45 (1.3)  | 1.9                                        |
| Indonesia (PW-)       | 2,324                                                    | 4,291 | 4,913  | 110 (4.7)                                                                                                      | 31 (0.7)  | 31 (0.6)  | 1.8                                        |
| Japan (LUP)           | 5,434                                                    | 6,344 | 6,722  | 34 (0.6)                                                                                                       | 34 (0.5)  | 0 (0)     | 0.4                                        |
| Korea, Rep. (LUP)     | 4,599                                                    | 6,363 | 6,363  | 210 (4.6)                                                                                                      | 0 (0)     | 0 (0)     | 0.9                                        |
| Thailand (PW+)        | 1,881                                                    | 2,155 | 3,059  | 10 (0.5)                                                                                                       | 45 (2.1)  | 45 (1.5)  | 1.3                                        |
| Philippines (L)       | 1,601                                                    | 2,697 | 3,793  | 55 (3.4)                                                                                                       | 55 (2.0)  | 55 (1.5)  | 2.1                                        |
| United States:        |                                                          |       |        |                                                                                                                |           |           |                                            |
| California (LUP)      | 5,917                                                    | 8,645 | 8,822  | 136 (2.3)                                                                                                      | 136 (1.6) | 0 (0)     | 1.1                                        |
| south-central (LLP)   | 4,787                                                    | 5,745 | 7,661  | 0 (0)                                                                                                          | 96 (1.7)  | 96 (1.3)  | 1.3                                        |
| Vietnam (LLP)         | 2,013                                                    | 3,179 | 5,299  | 0 (0)                                                                                                          | 106 (3.3) | 106 (2.0) | 2.9                                        |
| <i>Wheat</i>          |                                                          |       |        |                                                                                                                |           |           |                                            |
| Argentina (L)         | 1,396                                                    | 2,088 | 2,780  | 35 (2.5)                                                                                                       | 35 (1.7)  | 35 (1.3)  | 1.8                                        |
| Australia (L)         | 1,250                                                    | 1,514 | 1,778  | 13 (1.9)                                                                                                       | 13 (0.9)  | 13 (0.7)  | 0.9                                        |
| Canada (LLP)          | 1,734                                                    | 2,041 | 2,655  | 0 (0)                                                                                                          | 31 (1.5)  | 31 (1.2)  | 1.2                                        |
| China (L)             | 1,213                                                    | 2,989 | 4,765  | 89 (7.3)                                                                                                       | 89 (3.0)  | 89 (1.9)  | 3.0                                        |
| Denmark (LUP)         | 4,630                                                    | 6,692 | 7,208  | 103 (2.2)                                                                                                      | 103 (1.5) | 0 (0)     | 1.2                                        |
| France (LUP)          | 3,834                                                    | 6,332 | 7,081  | 125 (2.7)                                                                                                      | 125 (1.9) | 0 (0)     | 1.6                                        |
| Germany (LUP)         | 3,972                                                    | 6,344 | 7,494  | 119 (3.0)                                                                                                      | 119 (1.9) | 0 (0)     | 1.7                                        |
| India (LUP)           | 1,203                                                    | 2,265 | 2,727  | 53 (4.4)                                                                                                       | 53 (2.3)  | 0 (0)     | 2.3                                        |
| The Netherlands (LUP) | 4,846                                                    | 7,962 | 8,445  | 156 (3.2)                                                                                                      | 156 (2.0) | 0 (0)     | 1.5                                        |
| United Kingdom (LUP)  | 4,284                                                    | 7,024 | 7,805  | 137 (3.2)                                                                                                      | 137 (2.0) | 0 (0)     | 1.6                                        |
| US Great Plains:      |                                                          |       |        |                                                                                                                |           |           |                                            |
| south (LUP)           | 1,632                                                    | 2,005 | 2,005  | 34 (2.1)                                                                                                       | 0 (0)     | 0 (0)     | 0.6                                        |
| central (L)           | 2,013                                                    | 2,393 | 2,773  | 19 (0.9)                                                                                                       | 19 (0.8)  | 19 (0.7)  | 0.8                                        |
| north (LLP)           | 1,705                                                    | 2,292 | 2,850  | 0 (0)                                                                                                          | 28 (1.2)  | 28 (1.0)  | 1.1                                        |
| <i>Maize</i>          |                                                          |       |        |                                                                                                                |           |           |                                            |
| Africa:               |                                                          |       |        |                                                                                                                |           |           |                                            |
| eastern (LUP)         | 1,185                                                    | 1,390 | 1,390  | 20 (1.6)                                                                                                       | 0 (0)     | 0 (0)     | 0.6                                        |
| central (LLP)         | 761                                                      | 774   | 1,034  | 0 (0)                                                                                                          | 13 (1.7)  | 13 (1.3)  | 0.7                                        |
| west (LLP)            |                                                          |       |        | 0 (0)                                                                                                          | 28 (2.4)  | 28 (1.6)  | 2.0                                        |
| Argentina (PW+)       | 2,334                                                    | 3,832 | 7,348  | 70 (3.0)                                                                                                       | 176 (4.6) | 176 (2.4) | 3.0                                        |
| Brazil (PW+)          | 1,390                                                    | 1,948 | 4,046  | 28 (3.5)                                                                                                       | 105 (5.4) | 105 (2.6) | 3.0                                        |
| China (PW-)           | 1,938                                                    | 4,242 | 5,293  | 115 (5.9)                                                                                                      | 115 (2.7) | 42 (0.8)  | 2.3                                        |
| France (LUP)          | 4,425                                                    | 7,171 | 8,901  | 137 (3.1)                                                                                                      | 137 (1.9) | 0 (0)     | 1.8                                        |
| India (LLP)           | 1,045                                                    | 1,436 | 2,146  | 0 (0)                                                                                                          | 36 (2.5)  | 36 (1.7)  | 2.0                                        |
| Italy (LUP)           | 4,665                                                    | 8,045 | 9,347  | 169 (3.6)                                                                                                      | 169 (2.1) | 0 (0)     | 1.7                                        |
| US Corn Belt          |                                                          |       |        |                                                                                                                |           |           |                                            |
| east, rainfed (L)     | 5,423                                                    | 7,783 | 10,143 | 118 (2.2)                                                                                                      | 118 (1.5) | 118 (1.2) | 1.6                                        |
| west, irrigated (L)   | 6,629                                                    | 9,201 | 11,773 | 129 (1.9)                                                                                                      | 129 (1.4) | 129 (1.1) | 1.5                                        |
| west, rainfed (L)     | 3,607                                                    | 5,285 | 6,963  | 84 (2.3)                                                                                                       | 84 (1.6)  | 84 (1.2)  | 1.7                                        |

L: linear; QP: quadratic plateau; PW: piecewise with (+) increasing or (-) decreasing rate after breakpoint year; LUP/LLP: linear with upper/lower plateau; EXP: compound exponential.

\* Trend-line yields in 1970, 1990, and 2010 were estimated from the best-fit model, which is indicated in parenthesis for each crop-region.

† Absolute rate of gain was calculated from the first derivative of the best-fit model. In some regions, a PW or LP model indicated different yield gain rates for initial years versus recent years. Dividing the rate of gain by the predicted trend-line yield in a given year provides the relative rate of gain, which is expressed as a percentage and shown in parenthesis.

‡ Calculated compound rate of yield increase for the entire time interval (estimated parameter b of EXP model, which is expressed as a percentage).

**Supplementary Table S6 Examination of the number of years needed to identify a statistically significant upper yield plateau in crop-region cases exhibiting yield stagnation.**

| Crop-region                | $r^2$ * | $y_0$ (kg ha <sup>-1</sup> ) | $x_0$ | Data-year at which $x_0$ became statistically significant (Student's $t$ -test; $P < 0.01$ ) |
|----------------------------|---------|------------------------------|-------|----------------------------------------------------------------------------------------------|
| <i>Rice</i>                |         |                              |       |                                                                                              |
| China                      | 0.97    | 6,394                        | 1997  | 2000                                                                                         |
| Japan                      | 0.63    | 6,466                        | 1997  | 2006                                                                                         |
| Korea, Rep. of             | 0.81    | 6,363                        | 1978  | 1990                                                                                         |
| California                 | 0.87    | 8,822                        | 1992  | 1997                                                                                         |
| <i>Wheat</i>               |         |                              |       |                                                                                              |
| Denmark                    | 0.84    | 7,208                        | 1995  | 2001                                                                                         |
| France                     | 0.93    | 7,081                        | 1996  | 2002                                                                                         |
| Germany                    | 0.94    | 7,494                        | 2000  | 2005                                                                                         |
| India                      | 0.98    | 2,727                        | 2000  | 2006                                                                                         |
| The Netherlands            | 0.90    | 8,445                        | 1993  | 2001                                                                                         |
| United Kingdom             | 0.91    | 7,805                        | 1996  | 2001                                                                                         |
| Southern U.S. Great Plains | 0.30    | 2,005                        | 1983  | 1995                                                                                         |
| <i>Maize</i> <sup>b</sup>  |         |                              |       |                                                                                              |
| East Africa                | 0.49    | 1,390                        | 1984  | 2001                                                                                         |
| France                     | 0.91    | 8,901                        | 2003  | 2008                                                                                         |
| Italy                      | 0.96    | 9,347                        | 1997  | 2003                                                                                         |

$y_0$ : yield plateau level (kg ha<sup>-1</sup>);  $x_0$ : breakpoint year. Analyses were based on 46 years of yield data (1965-2010) except for the USA ( $n = 47$ , 1965-2011 time period).

\* Coefficient of determination ( $r^2$ ) for the linear with upper plateau model fitted to the entire yield trend.

**Supplementary Table S7 Goodness of fit for different statistical models fitted to yield trends of the three major cereals crops in selected regions.**

| Country/region   | Statistical model * |            |                             |                             |                   |
|------------------|---------------------|------------|-----------------------------|-----------------------------|-------------------|
|                  | L                   | QP         | PW †                        | LP †                        | EXP               |
| <i>Rice</i>      |                     |            |                             |                             |                   |
| Bangladesh       | 0.92 (234)          |            | <b>0.98 (120) [+; 1988]</b> |                             | 0.97 (141)        |
| China            | 0.93 (337)          | 0.96 (256) |                             | <b>0.97 (216) [U; 1997]</b> | 0.88 (431)        |
| India            | <b>0.95 (142)</b>   |            |                             |                             | 0.93 (163)        |
| Indonesia        | 0.91 (297)          | 0.97 (172) | <b>0.98 (130) [-; 1987]</b> |                             | 0.85 (380)        |
| Japan            | <b>0.61 (294)</b>   |            |                             | <b>0.63 (290) [U; 1997]</b> | 0.60 (297)        |
| Korea, Rep. of   | 0.62 (566)          | 0.79 (434) |                             | <b>0.81 (412) [U; 1978]</b> | 0.60 (588)        |
| Philippines      | <b>0.95 (166)</b>   |            |                             |                             | 0.93 (205)        |
| Thailand         | 0.86 (151)          |            | <b>0.95 (89) [+; 1988]</b>  |                             | 0.90 (129)        |
| United States:   |                     |            |                             |                             |                   |
| California       | 0.77 (640)          | 0.84 (550) |                             | <b>0.87 (490) [U; 1992]</b> | 0.74 (683)        |
| southern         | 0.87 (371)          |            |                             | <b>0.93 (269) [L; 1980]</b> | 0.90 (331)        |
| Vietnam          | 0.94 (292)          |            |                             | <b>0.99 (134) [L; 1979]</b> | 0.98 (177)        |
| <i>Wheat</i>     |                     |            |                             |                             |                   |
| Argentina        | <b>0.80 (232)</b>   |            |                             |                             | <b>0.80 (234)</b> |
| Australia        | <b>0.23 (330)</b>   |            |                             |                             | <b>0.22 (333)</b> |
| Canada           | 0.63 (247)          |            |                             | <b>0.63 (248) [L; 1980]</b> | 0.64 (242)        |
| China            | <b>0.97 (198)</b>   |            |                             |                             | 0.93 (321)        |
| Denmark          | 0.78 (555)          | 0.82 (500) |                             | <b>0.84 (477) [U; 1995]</b> | 0.74 (593)        |
| France           | 0.86 (521)          | 0.91 (415) |                             | <b>0.93 (387) [U; 1996]</b> | 0.81 (605)        |
| Germany          | 0.92 (418)          | 0.93 (397) |                             | <b>0.94 (365) [U; 2000]</b> | 0.89 (487)        |
| India            | 0.96 (126)          | 0.97 (111) |                             | <b>0.98 (94) [U; 2000]</b>  | 0.92 (185)        |
| The Netherlands  | 0.84 (648)          | 0.89 (522) |                             | <b>0.90 (503) [U; 1993]</b> | 0.79 (731)        |
| United Kingdom   | 0.85 (598)          | 0.90 (488) |                             | <b>0.91 (451) [U; 1996]</b> | 0.80 (684)        |
| US Great Plains: |                     |            |                             |                             |                   |
| south            | 0.24 (291)          |            |                             | <b>0.35 (273) [U; 1983]</b> | 0.23 (293)        |
| central          | <b>0.37 (346)</b>   |            |                             | 0.35 (355) [U; 1984]        | <b>0.36 (349)</b> |
| north            | 0.47 (318)          |            |                             | <b>0.50 (312) [L; 1979]</b> | <b>0.48 (314)</b> |
| <i>Maize</i>     |                     |            |                             |                             |                   |
| Africa:          |                     |            |                             |                             |                   |
| east             | 0.44 (133)          |            |                             | <b>0.49 (128) [U; 1984]</b> | 0.42 (135)        |
| central          | 0.50 (75)           |            |                             | <b>0.73 (56) [L; 1989]</b>  | 0.53 (73)         |
| west             | 0.87 (116)          |            |                             | <b>0.91 (96) [L; 1979]</b>  | 0.91 (96)         |
| Argentina        | 0.87 (614)          |            | <b>0.91 (512) [+; 1990]</b> |                             | <b>0.90 (526)</b> |
| Brazil           | 0.87 (314)          |            | <b>0.96 (183) [+; 1990]</b> |                             | 0.94 (215)        |
| China            | 0.94 (306)          | 0.96 (247) | <b>0.97 (211) [-; 1993]</b> |                             | 0.89 (433)        |
| France           | 0.91 (555)          |            |                             | <b>0.91 (536) [U; 2003]</b> | 0.89 (593)        |
| India            | 0.85 (157)          |            |                             | <b>0.90 (134) [L; 1978]</b> | 0.88 (142)        |
| Italy            | 0.90 (602)          | 0.96 (393) |                             | <b>0.96 (380) [U; 1997]</b> | 0.85 (759)        |
| US Corn Belt:    |                     |            |                             |                             |                   |
| east, rainfed    | <b>0.82 (774)</b>   |            |                             |                             | <b>0.83 (757)</b> |
| west, irrigated  | <b>0.93 (491)</b>   |            |                             |                             | <b>0.93 (490)</b> |
| west, rainfed    | <b>0.64 (879)</b>   |            |                             |                             | <b>0.65 (867)</b> |

Note that the coefficient of determination ( $r^2$ ) and root mean square error (in parenthesis; in  $\text{kg ha}^{-1}$ ) are shown for the different statistical models fitted yield to trends of rice, wheat, and maize in selected regions. Best-fit model(s) identified for each crop and country or region is (are) highlighted in bold (see Supplementary Table S4). L: linear; QP: quadratic plateau; PW: piecewise with (+) increasing or (-) decreasing rate after breakpoint year; LP: linear with upper (U)/lower (L) plateau; EXP: compound exponential. Forty-six years of yield data were used in the regression analyses (1965-2010) for all countries except the USA ( $n = 47, 1965-2011$ ).

\* Only models with statistically significant parameters are shown (Student's  $t$ -test;  $P < 0.01$ ). Note that PW and LP models are mutually exclusive. † Breakpoint year is shown in brackets.

**Supplementary Table S8 Durbin-Watson statistics and tests for normality and variance homogeneity for all crop-region-model cases.**

| Country/region   | Statistical model † |      |             |               |               |
|------------------|---------------------|------|-------------|---------------|---------------|
|                  | L                   | QP   | PW          | LP            | EXP           |
| <i>Rice</i>      |                     |      |             |               |               |
| Bangladesh       | 0.24 §              |      | <b>0.88</b> |               | 0.61          |
| China            | 0.20 ‡, §           | 0.35 |             | <b>0.46</b>   | 0.14 ‡, §     |
| India            | <b>1.94</b>         |      |             |               | 1.47          |
| Indonesia        | 0.11 ‡              | 0.31 | <b>0.52</b> |               | 0.07 ‡        |
| Japan            | <b>1.62</b>         |      |             | <b>1.65</b>   | 1.54          |
| Korea, Rep. of   | 0.64                | 1.03 |             | <b>1.12</b>   | 0.56 §        |
| Philippines      | <b>0.69</b>         |      |             |               | 0.46          |
| Thailand         | 0.60                |      | <b>1.57</b> |               | 0.81          |
| United States:   |                     |      |             |               |               |
| California       | 0.94                | 1.30 |             | <b>1.61</b>   | 0.83          |
| south-central    | 0.69                |      |             | <b>1.30</b>   | 0.86          |
| Vietnam          | 0.23 §              |      |             | <b>0.96 §</b> | 0.58          |
| <i>Wheat</i>     |                     |      |             |               |               |
| Argentina        | <b>2.00</b>         |      |             |               | <b>1.96</b>   |
| Australia        | <b>2.12</b>         |      |             |               | <b>2.09</b>   |
| Canada           | 1.41 ‡              |      |             | <b>1.43</b>   | 1.47 ‡        |
| China            | <b>0.80</b>         |      |             |               | 0.31 ‡        |
| Denmark          | 1.25                | 1.51 |             | <b>1.70</b>   | 1.10          |
| France           | 1.12                | 1.80 |             | <b>2.05</b>   | 0.84 §        |
| Germany          | 1.54 §              | 1.73 |             | <b>2.04</b>   | 1.14 §        |
| India            | 0.81 §              | 1.06 |             | <b>1.44</b>   | 0.39 §        |
| The Netherlands  | 1.15                | 1.92 |             | <b>1.95</b>   | 0.91          |
| United Kingdom   | 1.02                | 1.57 |             | <b>1.81</b>   | 0.79          |
| US Great Plains: |                     |      |             |               |               |
| south            | 1.57                |      |             | <b>1.82</b>   | 1.55          |
| central          | <b>1.49</b>         |      |             | 1.44          | <b>1.47</b>   |
| north            | 1.55                |      |             | <b>1.64</b>   | <b>1.59</b>   |
| <i>Maize</i>     |                     |      |             |               |               |
| Africa:          |                     |      |             |               |               |
| east             | 1.55                |      |             | <b>1.71</b>   | 1.52          |
| central          | 0.57                |      |             | <b>1.03</b>   | 0.60          |
| west             | 0.81                |      |             | <b>1.19</b>   | 1.16          |
| Argentina        | 1.53 †              |      | <b>2.09</b> |               | <b>2.07</b>   |
| Brazil           | 0.70                |      | <b>1.95</b> |               | 1.33          |
| China            | 0.89                | 1.36 | <b>1.93</b> |               | 0.45          |
| France           | 1.21                |      |             | <b>1.32</b>   | 1.07          |
| India            | 1.54                |      |             | <b>2.17</b>   | 1.88          |
| Italy            | 0.49                | 0.98 |             | <b>1.20</b>   | 0.32 §        |
| US Corn Belt:    |                     |      |             |               |               |
| east, rainfed    | <b>2.05 ‡</b>       |      |             |               | <b>2.15 ‡</b> |
| west, irrigated  | <b>1.80 ‡</b>       |      |             |               | <b>1.82 ‡</b> |
| west, rainfed    | <b>1.79</b>         |      |             |               | <b>1.83</b>   |

Note that Durbin-Watson statistics (DW) are shown for the different statistical models fitted to yield trends of rice, wheat, and maize in selected regions. Serial correlation is significant when  $DW < 1.25$  ( $P < 0.01$ ). Note that the best-fit model(s) identified for each crop and country or region is (are) highlighted in bold (see Supplementary Table S4). L: linear; QP: quadratic plateau; PW: piecewise with (+) increasing or (-) decreasing rate after breakpoint year; LUP/LLP: linear with upper/lower plateau; EXP: compound exponential. Total number of Forty-six years of yield data were used in the regression analyses (1965-2010) except for the USA ( $n = 47$ , 1965-2011).

† Only values for models with statistically significant parameters are shown (Student's  $t$ -test;  $P < 0.01$ ). Note that PW and LP models are mutually exclusive.

‡ Residuals distribution deviates from normality (Shapiro-Wilks test;  $P < 0.01$ ).

§ Residuals variance is not homogenous across years (Levene test;  $P < 0.01$ ).



**Supplementary Table S9 Assessment of data transformation impact on model performance for all crop-region-model cases.**

| Country/region   | Statistical model*                 |                        |                                 |                                         |                                 |
|------------------|------------------------------------|------------------------|---------------------------------|-----------------------------------------|---------------------------------|
|                  | L                                  | QP                     | PW                              | LP                                      | EXP                             |
| <i>Rice</i>      |                                    |                        |                                 |                                         |                                 |
| Bangladesh       | $\lambda = -1$ (0.97) <sup>†</sup> |                        |                                 | <b><math>\lambda = 1</math></b>         | $\lambda = 1$                   |
| China            | $\lambda = 2$ (0.95)               | $\lambda = 1$          |                                 | $\lambda = 1$                           | $\lambda = 0$ (0.90)            |
| India            | <b><math>\lambda = 1</math></b>    | $\lambda = 0$ (0.94)   | $\lambda = -0.5$ (0.94)         |                                         | $\lambda = 1$                   |
| Indonesia        | $\lambda = 2$ (0.95)               | $\lambda = 0$ (0.98)   |                                 | $\lambda = 1$                           | $\lambda = 2$ (0.87)            |
| Japan            | <b><math>\lambda = 1</math></b>    |                        |                                 | <b><math>\lambda = 1</math></b>         | $\lambda = 1$                   |
| Korea, Rep. of   | $\lambda = 1$                      | $\lambda = -2$ (0.88)  | $\lambda = -1$ (0.90)           | <b><math>\lambda = -1</math> (0.90)</b> | $\lambda = 0$ (0.61)            |
| Philippines      | <b><math>\lambda = 1</math></b>    |                        |                                 |                                         | $\lambda = 1$                   |
| Thailand         | $\lambda = -0.5$ (0.86)            |                        | <b><math>\lambda = 1</math></b> | $\lambda = 1$                           | $\lambda = 2$ (0.92)            |
| United States:   |                                    |                        |                                 |                                         |                                 |
| California       | $\lambda = 1$                      | $\lambda = 1$          |                                 | <b><math>\lambda = 1</math></b>         | $\lambda = -0.5$ (0.77)         |
| south-central    | $\lambda = 1$                      |                        |                                 | <b><math>\lambda = 1</math></b>         | $\lambda = 2$ (0.91)            |
| Vietnam          | $\lambda = 0$ (0.95)               |                        |                                 | <b><math>\lambda = 1</math></b>         | $\lambda = 1$                   |
| <i>Wheat</i>     |                                    |                        |                                 |                                         |                                 |
| Argentina        | <b><math>\lambda = 1</math></b>    | $\lambda = 0.5$ (0.82) | $\lambda = -1$ (0.80)           |                                         | <b><math>\lambda = 1</math></b> |
| Australia        | <b><math>\lambda = 1</math></b>    |                        |                                 |                                         | <b><math>\lambda = 1</math></b> |
| Canada           | $\lambda = 1$                      |                        |                                 | <b><math>\lambda = 1</math></b>         | $\lambda = 1$                   |
| China            | <b><math>\lambda = 1</math></b>    |                        |                                 |                                         | $\lambda = 1$                   |
| Denmark          | $\lambda = 1$                      | $\lambda = 1$          |                                 | <b><math>\lambda = 1</math></b>         | $\lambda = 0$ (0.79)            |
| France           | $\lambda = 1$                      | $\lambda = 1$          |                                 | <b><math>\lambda = 1</math></b>         | $\lambda = 0$ (0.83)            |
| Germany          | $\lambda = 1$                      | $\lambda = 1$          |                                 | <b><math>\lambda = 1</math></b>         | $\lambda = 0$ (0.83)            |
| India            | $\lambda = 1$                      | $\lambda = 1$          |                                 | <b><math>\lambda = 1</math></b>         | $\lambda = 1$                   |
| The Netherlands  | $\lambda = 1$                      | $\lambda = 1$          |                                 | <b><math>\lambda = 1</math></b>         | $\lambda = 0$ (0.81)            |
| United Kingdom   | $\lambda = 1$                      | $\lambda = 1$          |                                 | <b><math>\lambda = 1</math></b>         | $\lambda = 1$                   |
| US Great Plains: |                                    |                        |                                 |                                         |                                 |
| south            | $\lambda = 1$                      |                        |                                 | <b><math>\lambda = 1</math></b>         | $\lambda = 1$                   |
| central          | <b><math>\lambda = 1</math></b>    |                        |                                 | $\lambda = 1$                           | <b><math>\lambda = 1</math></b> |
| north            | $\lambda = 1$                      |                        |                                 | <b><math>\lambda = 1</math></b>         | <b><math>\lambda = 1</math></b> |
| <i>Maize</i>     |                                    |                        |                                 |                                         |                                 |
| Africa           |                                    |                        |                                 |                                         |                                 |
| east             | $\lambda = 1$                      | $\lambda = -2$ (0.58)  |                                 | <b><math>\lambda = -1</math> (0.57)</b> | $\lambda = 1$                   |
| central          | $\lambda = 1$                      |                        |                                 | <b><math>\lambda = 1</math></b>         | $\lambda = 2$ (0.52)            |
| west             | $\lambda = 1$                      |                        |                                 | <b><math>\lambda = 1</math></b>         | $\lambda = 1$                   |
| Argentina        | $\lambda = 0$ (0.90)               |                        |                                 | <b><math>\lambda = 1</math></b>         | <b><math>\lambda = 1</math></b> |
| Brazil           | $\lambda = -1$ (0.93)              |                        |                                 | <b><math>\lambda = 1</math></b>         | $\lambda = 1$                   |
| China            | $\lambda = 1$                      | $\lambda = 1$          |                                 | <b><math>\lambda = 1</math></b>         | $\lambda = 1$                   |
| France           | $\lambda = 1$                      |                        |                                 | <b><math>\lambda = 1</math></b>         | $\lambda = 1$                   |
| India            | $\lambda = 0$ (0.86)               |                        |                                 | $\lambda = 1$                           | <b><math>\lambda = 1</math></b> |
| Italy            | $\lambda = 2$ (0.84)               | $\lambda = 1$          | $\lambda = -1$ (0.97)           | <b><math>\lambda = 1</math></b>         | $\lambda = 1$                   |
| US Corn Belt:    |                                    |                        |                                 |                                         |                                 |
| east, rainfed    | <b><math>\lambda = 1</math></b>    |                        |                                 |                                         | <b><math>\lambda = 1</math></b> |
| west, irrigated  | <b><math>\lambda = 1</math></b>    |                        |                                 |                                         | <b><math>\lambda = 1</math></b> |
| west, rainfed    | <b><math>\lambda = 1</math></b>    |                        |                                 |                                         | <b><math>\lambda = 1</math></b> |

Note that the best-fit model(s) identified for each crop and country or region is (are) highlighted in bold (see Supplementary Table S5). L: linear; QP: quadratic plateau; PW: piecewise; LP: linear plateau; EXP: compound exponential. Forty-six years of yield data were used in the regression analysis (1965-2010) except for USA ( $n = 47$ , 1965-2011).

\* Only models with statistically significant parameters are shown (Student's  $t$ -test;  $P < 0.01$ ).

<sup>†</sup> Recommended transformation for grain yield according to Box-Cox method. If  $\lambda = 1$ , no transformation is needed; if  $\lambda \neq 1$ , model performance improves with transformed data (re-calculated  $r^2$  based on transformed grain yield data is shown in parenthesis). Recommended transformation of dependent variable is square, square-root, natural log, inverse square-root, reciprocal, and inverse square for  $\lambda = 2, 0.5, 0, -0.5, -1$ , and  $-2$ , respectively.
